# Supplementary material for: Influenza A virus infection in turkeys induces respiratory and enteric bacterial dysbiosis correlating with cytokine gene expression
Source: PeerJ. 2021 Jul 22;9:e11806. doi: 10.7717/peerj.11806 (PMC8310620; doi:10.7717/peerj.11806)
Supplement: Supplemental Information 5 [file peerj-09-11806-s005.docx]

| Table S1. Location, identity, and number of predominant taxa | | | | | | | | | | | | | | | | | |
| --- | --- | --- | --- | --- | --- | --- | --- | --- | --- | --- | --- | --- | --- | --- | --- | --- | --- |
| Lowest taxonomic classification | Taxon name | # ASVs | Nasal | | | Trachea | | | LRT | | | Cecum | | | Ileum | | |
| Mock | TKMN | CKPA | Mock | TKMN | CKPA | Mock | TKMN | CKPA | Mock | TKMN | CKPA | Mock | TKMN | CKPA |
| Genus | Anaerostipes | 3 | × |  |  |  |  |  |  |  |  | × | × | × | × |  |  |
| Butyricicoccus | 6 |  |  |  |  |  |  |  |  |  | × | × | × |  |  |  |
| Clostridium | 38 |  |  | × |  |  |  |  | × | × |  |  |  |  | × |  |
| Enterococcus | 5 |  | × | × |  |  |  |  | × | × |  |  |  |  |  |  |
| Erysipelatoclostridium | 11 | × | × |  | × |  |  |  |  |  | × | × | × | × |  | × |
| Escherichia-Shigella | 2 |  | × | × |  | × | × |  |  | × | × | × | × | × | × | × |
| Flavobacterium | 13 |  |  |  |  |  |  | × |  |  |  |  |  |  |  |  |
| Flavonifractor | 2 |  |  |  |  |  |  |  |  |  | × | × | × |  |  |  |
| Lactobacillus | 21 | × |  |  | × | × |  | × |  |  |  |  |  | × |  |  |
| Macrococcus | 1 | × | × |  |  |  |  |  |  |  |  |  |  |  |  |  |
| Merdibacter | 1 |  |  |  |  |  |  |  |  |  | × | × | × |  |  |  |
| Pseudomonas | 19 |  | × | × |  |  |  |  |  |  |  |  |  |  |  |  |
| Romboutsia | 10 |  |  |  |  |  |  |  |  |  |  |  |  | × |  |  |
| Ruminiclostridium | 14 |  |  |  |  |  |  |  |  |  | × | × | × |  |  |  |
| Ruminococcus | 23 | × |  |  |  | × |  |  |  |  | × | × | × | × |  |  |
| Sellimonas | 7 |  |  |  |  |  |  |  |  |  | × |  | × |  |  |  |
| Staphylococcus | 7 | × | × | × |  |  | × |  |  |  |  |  |  |  |  |  |
| Subdoligranulum | 4 | × |  |  | × |  |  |  |  |  | × |  |  | × |  | × |
| Family | Eggerthellaceae | 1 |  |  |  |  |  |  |  |  |  | × | × | × |  |  |  |
| Erysipelotrichaceae | 1 |  |  |  |  |  |  |  |  |  |  |  |  |  |  |  |
| Lachnospiraceae | 68 | × |  |  |  |  |  |  |  |  | × | × | × | × |  |  |
| Rhizobiaceae | 7 |  |  |  |  |  |  | × |  |  |  |  |  |  |  |  |
| Order | Clostridiales | 14 |  |  |  |  |  |  |  |  |  |  | × | × |  |  |  |
| Total: | 23 | 278 | 8/23 | 6/23 | 5/23 | 3/23 | 3/23 | 2/23 | 3/23 | 2/23 | 3/23 | 12/23 | 11/23 | 12/23 | 8/23 | 2/23 | 3/23 |
