# Supplementary material for: Influenza A virus infection in turkeys induces respiratory and enteric bacterial dysbiosis correlating with cytokine gene expression
Source: PeerJ. 2021 Jul 22;9:e11806. doi: 10.7717/peerj.11806 (PMC8310620; doi:10.7717/peerj.11806)
Supplement: Supplemental Information 7 [file peerj-09-11806-s007.xlsx]

## Sheet: IFN-alpha
	Bird #	Ct [GAPDH]	Mean Ct of control [GAPDH]	-∆∆	2-∆∆	Mean fold change in IFN-α gene expression	2-∆∆/Mean fold change in IFN-α gene expression	IFN-α fold change over control (whole group)	Log2 IFN-α fold change (Individual birds)
Control	201	14.0985	14.2737	-2.14674	4.42827	1.39254	3.18	1	1.66903
	202	13.9617	14.2737	0.947956	0.518366		0.372246		-1.42567
	203	14.5807	14.2737	-0.166944	1.12268		0.80621		-0.310772
	204	14.1346	14.2737	-1.70354	3.257		2.3389		1.22583
	205	14.0999	14.2737	0.0300562	0.979382		0.703308		-0.507772
	206	14.056	14.2737	0.261056	0.834477		0.599249		-0.738772
	207	14.9027	14.2737	-0.328744	1.25592		0.901893		-0.148972
	208	14.0637	14.2737	-0.536144	1.45009		1.04133		0.0584276
	209	14.3808	14.2737	-0.577044	1.49179		1.07127		0.0993276
	210	14.3685	14.2737	-0.477144	1.39199		0.999603		-0.000572424
	211	14.2138	14.2737	-0.774844	1.711		1.2287		0.297128
	213	14.1023	14.2737	0.0497563	0.9661		0.693769		-0.527472
	215	14.6434	14.2737	3.20406	0.108513		0.0779249		-3.68177
	216	14.4337	14.2737	1.85256	0.276901		0.198847		-2.33027
	297	14.2153	14.2737	-1.08574	2.12247		1.52417		0.608028
	298	14.1241	14.2737	1.45146	0.365652		0.26258		-1.92917
CKPA	233	14.3099	14.2737	-1.72904	3.31508	3.71265	2.3806	2.6661	1.25133
	234	14.4071	14.2737	-0.188544	1.13961		0.818371		-0.289172
	235	14.4274	14.2737	-2.68164	6.41586		4.60732		2.20393
	236	14.3143	14.2737	-0.257744	1.19561		0.858582		-0.219972
	250	14.3597	14.2737	-1.95024	3.8644		2.77508		1.47253
	252	14.4271	14.2737	-4.00514	16.0571		11.5309		3.52743
	301	14.3662	14.2737	-0.914244	1.88458		1.35334		0.436528
	302	14.3668	14.2737	-2.04634	4.13058		2.96622		1.56863
	241	14.2713	14.2737	-2.46214	5.51035		3.95706		1.98443
	242	13.9778	14.2737	-1.18294	2.2704		1.6304		0.705228
	243	14.1995	14.2737	-1.10314	2.14822		1.54267		0.625428
	244	14.0022	14.2737	-0.836544	1.78577		1.28238		0.358828
	245	13.9913	14.2737	-1.91124	3.76133		2.70106		1.43353
	247	14.0699	14.2737	0.900256	0.535792		0.384759		-1.37797
	248	13.9732	14.2737	-1.56024	2.94904		2.11774		1.08253
	259	14.2081	14.2737	-1.28604	2.43858		1.75118		0.808328
TKMN	265	14.1063	14.2737	-2.20434	4.60865	6.13596	3.30953	4.40631	1.72663
	266	14.2483	14.2737	-2.11884	4.34346		3.1191		1.64113
	267	16.5487	14.2737	-3.33974	10.1243		7.27036		2.86203
	268	14.1832	14.2737	-3.02074	8.11586		5.82811		2.54303
	269	14.2398	14.2737	-4.12314	17.4257		12.5136		3.64543
	270	14.5942	14.2737	-3.43244	10.7961		7.75285		2.95473
	271	14.2195	14.2737	-2.27884	4.85289		3.48492		1.80113
	272	14.1082	14.2737	-1.39144	2.62341		1.88391		0.913728
	273	14.0709	14.2737	0.879656	0.543497		0.390292		-1.35737
	274	14.5007	14.2737	-3.59684	12.0992		8.68862		3.11913
	275	14.2786	14.2737	-1.05414	2.07649		1.49115		0.576428
	276	14.5351	14.2737	-3.18364	9.08599		6.52477		2.70593
	277	14.2488	14.2737	-1.33144	2.51654		1.80716		0.853728
	278	14.2192	14.2737	-1.47024	2.77069		1.98967		0.992528
	279	14.3625	14.2737	-1.10454	2.15031		1.54417		0.626828
	280	14.1234	14.2737	-2.01514	4.04221		2.90276		1.53743
	Bird #	Ct [IFN-α]	Mean Ct of control [IFN-α]
Control	201	19.4061	21.7281
	202	22.364	21.7281
	203	21.8681	21.7281
	204	19.8854	21.7281
	205	21.5843	21.7281
	206	21.7714	21.7281
	207	22.0283	21.7281
	208	20.9819	21.7281
	209	21.2581	21.7281
	210	21.3457	21.7281
	211	20.8933	21.7281
	213	21.6064	21.7281
	215	25.3018	21.7281
	216	23.7406	21.7281
	297	20.5839	21.7281
	298	23.0299	21.7281
CKPA	233	20.0352	21.7281
	234	21.6729	21.7281
	235	19.2001	21.7281
	236	21.5109	21.7281
	250	19.8638	21.7281
	252	17.8763	21.7281
	301	20.9063	21.7281
	302	19.7748	21.7281
	241	19.2635	21.7281
	242	20.2492	21.7281
	243	20.5507	21.7281
	244	20.62	21.7281
	245	19.5344	21.7281
	247	22.4245	21.7281
	248	19.8673	21.7281
	259	20.3764	21.7281
TKMN	265	19.3563	21.7281
	266	19.5838	21.7281
	267	20.6633	21.7281
	268	18.6168	21.7281
	269	17.571	21.7281
	270	18.6161	21.7281
	271	19.395	21.7281
	272	20.1711	21.7281
	273	22.4049	21.7281
	274	18.3582	21.7281
	275	20.6788	21.7281
	276	18.8058	21.7281
	277	20.3717	21.7281
	278	20.2033	21.7281
	279	20.7123	21.7281
	280	19.5626	21.7281

## Sheet: IFN-beta
	Bird #	Ct [GAPDH]	Mean Ct of control [GAPDH]	-∆∆	2-∆∆	Mean fold change in IFN-β gene expression	2-∆∆/Mean fold change in IFN-β gene expression	IFN-β fold change over control (whole group)	Log2 IFN-β fold change (Individual birds)
Control	201	14.0985	14.2737	-1.1853	2.27411	1.19655	1.90055	1	0.926415
	202	13.9617	14.2737	1.6271	0.323738		0.270559		-1.88598
	203	14.5807	14.2737	0.8138	0.568881		0.475433		-1.07268
	204	14.1346	14.2737	-0.5783	1.49309		1.24782		0.319415
	205	14.0999	14.2737	-0.4833	1.39794		1.1683		0.224415
	206	14.056	14.2737	-1.0034	2.00472		1.67541		0.744515
	207	14.9027	14.2737	-0.0375	1.02633		0.857742		-0.221385
	208	14.0637	14.2737	-0.5252	1.43913		1.20273		0.266315
	209	14.3808	14.2737	0.3165	0.803016		0.671107		-0.575385
	210	14.3685	14.2737	-0.0009	1.00062		0.836255		-0.257985
	211	14.2138	14.2737	-1.1272	2.18434		1.82553		0.868315
	213	14.1023	14.2737	-0.2044	1.15221		0.962938		-0.0544849
	215	14.6434	14.2737	1.5462	0.342411		0.286164		-1.80508
	216	14.4337	14.2737	-0.4094	1.32813		1.10997		0.150515
	297	14.2153	14.2737	-0.6154	1.53198		1.28033		0.356515
	298	14.1241	14.2737	1.8667	0.2742		0.229158		-2.12558
CKPA	233	14.3099	14.2737	-3.2879	9.7669	17.5846	8.16252	14.696	3.02902
	234	14.4071	14.2737	-1.3801	2.60286		2.1753		1.12122
	235	14.4274	14.2737	-5.2182	37.225		31.1102		4.95932
	236	14.3143	14.2737	-1.2399	2.36182		1.97385		0.981015
	250	14.3597	14.2737	-2.9645	7.80555		6.52336		2.70562
	252	14.4271	14.2737	-5.4297	43.1025		36.0222		5.17082
	301	14.3662	14.2737	-2.6947	6.47419		5.4107		2.43582
	302	14.3668	14.2737	-3.2628	9.59844		8.02174		3.00392
	241	14.2713	14.2737	-6.2698	77.161		64.486		6.01092
	242	13.9778	14.2737	-4.1307	17.5172		14.6397		3.87182
	243	14.1995	14.2737	-2.5967	6.04901		5.05536		2.33782
	244	14.0022	14.2737	-3.6082	12.1948		10.1916		3.34932
	245	13.9913	14.2737	-4.9124	30.1148		25.1679		4.65352
	247	14.0699	14.2737	-2.2567	4.77897		3.99395		1.99782
	248	13.9732	14.2737	-3.1029	8.59144		7.18016		2.84402
	259	14.2081	14.2737	-2.587	6.00848		5.02149		2.32812
TKMN	265	14.1063	14.2737	-1.4829	2.7951	9.08059	2.33596	7.58896	1.22402
	266	14.2483	14.2737	-0.085	1.06069		0.886452		-0.173885
	267	16.5487	14.2737	-3.8896	14.8213		12.3867		3.63072
	268	14.1832	14.2737	-1.4956	2.81981		2.35661		1.23672
	269	14.2398	14.2737	-6.3479	81.4532		68.0732		6.08902
	270	14.5942	14.2737	-2.4118	5.32138		4.44725		2.15292
	271	14.2195	14.2737	-1.5624	2.95345		2.4683		1.30352
	272	14.1082	14.2737	-1.9532	3.87232		3.23623		1.69432
	273	14.0709	14.2737	0.2056	0.867178		0.72473		-0.464485
	274	14.5007	14.2737	-3.8656	14.5768		12.1823		3.60672
	275	14.2786	14.2737	-1.018	2.02511		1.69245		0.759115
	276	14.5351	14.2737	-1.2584	2.3923		1.99933		0.999515
	277	14.2488	14.2737	-1.0483	2.06809		1.72837		0.789415
	278	14.2192	14.2737	-0.593	1.50838		1.2606		0.334115
	279	14.3625	14.2737	-0.2236	1.16764		0.975839		-0.0352849
	280	14.1234	14.2737	-2.482	5.58671		4.669		2.22312
	Bird #	Ct [IFN-β]	Mean Ct of control [IFN-β]
Control	201	25.3345	26.695
	202	28.0101	26.695
	203	27.8158	26.695
	204	25.9776	26.695
	205	26.0379	26.695
	206	25.4739	26.695
	207	27.2865	26.695
	208	25.9598	26.695
	209	27.1186	26.695
	210	26.7889	26.695
	211	25.5079	26.695
	213	26.3192	26.695
	215	28.6109	26.695
	216	26.4456	26.695
	297	26.0212	26.695
	298	28.4121	26.695
CKPA	233	23.4433	26.695
	234	25.4483	26.695
	235	21.6305	26.695
	236	25.4957	26.695
	250	23.8165	26.695
	252	21.4187	26.695
	301	24.0928	26.695
	302	23.5253	26.695
	241	20.4228	26.695
	242	22.2684	26.695
	243	24.0241	26.695
	244	22.8153	26.695
	245	21.5002	26.695
	247	24.2345	26.695
	248	23.2916	26.695
	259	24.0424	26.695
TKMN	265	25.0447	26.695
	266	26.5846	26.695
	267	25.0804	26.695
	268	25.1089	26.695
	269	20.3132	26.695
	270	24.6037	26.695
	271	25.0784	26.695
	272	24.5763	26.695
	273	26.6978	26.695
	274	23.0564	26.695
	275	25.6819	26.695
	276	25.698	26.695
	277	25.6218	26.695
	278	26.0475	26.695
	279	26.5602	26.695
	280	24.0627	26.695

## Sheet: IFN-gamma
	Bird #	Ct [GAPDH]	Mean Ct of control [GAPDH]	-∆∆	2-∆∆	Mean fold change in IFN-γ gene expression	2-∆∆/Mean fold change in IFN-γ gene expression	IFN-γ fold change over control (whole group)	Log2 IFN-γ fold change (Individual birds)
Control	201	14.0985	14.2737	-1.81886	3.52803	1.44941	2.43411	1	1.28339
	202	13.9617	14.2737	3.09064	0.117388		0.0809903		-3.62611
	203	14.5807	14.2737	-0.500363	1.41457		0.97596		-0.0351064
	204	14.1346	14.2737	-0.464463	1.3798		0.951974		-0.0710064
	205	14.0999	14.2737	-1.55846	2.9454		2.03213		1.02299
	206	14.056	14.2737	-0.990463	1.98682		1.37078		0.454994
	207	14.9027	14.2737	-1.21786	2.32602		1.6048		0.682394
	208	14.0637	14.2737	-1.41706	2.67041		1.84241		0.881594
	209	14.3808	14.2737	1.40864	0.376667		0.259876		-1.94411
	210	14.3685	14.2737	0.0826375	0.94433		0.651526		-0.618106
	211	14.2138	14.2737	-0.995263	1.99344		1.37535		0.459794
	213	14.1023	14.2737	-0.381263	1.30248		0.898627		-0.154206
	215	14.6434	14.2737	2.05824	0.240109		0.16566		-2.59371
	216	14.4337	14.2737	-0.273563	1.20879		0.833985		-0.261906
	297	14.2153	14.2737	0.986037	0.504863		0.348322		-1.52151
	298	14.1241	14.2737	1.99144	0.251488		0.17351		-2.52691
CKPA	233	14.3099	14.2737	-3.33106	10.0635	25.2155	6.94317	17.3971	2.79559
	234	14.4071	14.2737	-3.57206	11.8932		8.20551		3.03659
	235	14.4274	14.2737	-3.75316	13.4839		9.30298		3.21769
	236	14.3143	14.2737	-5.29466	39.2511		27.0807		4.75919
	250	14.3597	14.2737	-4.71026	26.1776		18.0608		4.17479
	252	14.4271	14.2737	-6.06866	67.1196		46.3081		5.53319
	301	14.3662	14.2737	-5.08436	33.927		23.4074		4.54889
	302	14.3668	14.2737	-4.76326	27.1572		18.7367		4.22779
	241	14.2713	14.2737	-3.71436	13.1261		9.05612		3.17889
	242	13.9778	14.2737	-4.26816	19.2684		13.2939		3.73269
	243	14.1995	14.2737	-4.21686	18.5953		12.8295		3.68139
	244	14.0022	14.2737	-4.62736	24.7158		17.0523		4.09189
	245	13.9913	14.2737	-4.98616	31.6945		21.8672		4.45069
	247	14.0699	14.2737	-4.57836	23.8905		16.4828		4.04289
	248	13.9732	14.2737	-4.95286	30.9714		21.3682		4.41739
	259	14.2081	14.2737	-3.59856	12.1137		8.35763		3.06309
TKMN	265	14.1063	14.2737	-2.07296	4.2075	8.54857	2.9029	5.89795	1.53749
	266	14.2483	14.2737	-0.182463	1.13482		0.782951		-0.353006
	267	16.5487	14.2737	-4.74586	26.8316		18.5121		4.21039
	268	14.1832	14.2737	-1.56446	2.95767		2.0406		1.02899
	269	14.2398	14.2737	-6.09706	68.454		47.2288		5.56159
	270	14.5942	14.2737	-3.24856	9.50418		6.55726		2.71309
	271	14.2195	14.2737	-1.05826	2.08242		1.43673		0.522794
	272	14.1082	14.2737	-2.07546	4.2148		2.90793		1.53999
	273	14.0709	14.2737	0.952237	0.51683		0.356579		-1.48771
	274	14.5007	14.2737	-3.50096	11.3213		7.81093		2.96549
	275	14.2786	14.2737	1.37704	0.385009		0.265631		-1.91251
	276	14.5351	14.2737	0.0585375	0.960237		0.662501		-0.594006
	277	14.2488	14.2737	0.0203375	0.986002		0.680277		-0.555806
	278	14.2192	14.2737	-1.08686	2.12412		1.4655		0.551394
	279	14.3625	14.2737	1.20054	0.435113		0.3002		-1.73601
	280	14.1234	14.2737	0.596137	0.661523		0.456407		-1.13161
	Bird #	Ct [ IFN-γ]	Mean Ct of control [IFN-γ]
Control	201	25.3262	27.3203
	202	30.0989	27.3203
	203	27.1269	27.3203
	204	26.7167	27.3203
	205	25.588	27.3203
	206	26.1121	27.3203
	207	26.7314	27.3203
	208	25.6932	27.3203
	209	28.836	27.3203
	210	27.4977	27.3203
	211	26.2651	27.3203
	213	26.7676	27.3203
	215	29.7482	27.3203
	216	27.2067	27.3203
	297	28.2479	27.3203
	298	29.1621	27.3203
CKPA	233	24.0254	27.3203
	234	23.8816	27.3203
	235	23.7208	27.3203
	236	22.0662	27.3203
	250	22.696	27.3203
	252	21.405	27.3203
	301	22.3284	27.3203
	302	22.6501	27.3203
	241	23.6035	27.3203
	242	22.7562	27.3203
	243	23.0292	27.3203
	244	22.4214	27.3203
	245	22.0517	27.3203
	247	22.5381	27.3203
	248	22.0669	27.3203
	259	23.6561	27.3203
TKMN	265	25.0799	27.3203
	266	27.1124	27.3203
	267	24.8494	27.3203
	268	25.6653	27.3203
	269	21.1893	27.3203
	270	24.3922	27.3203
	271	26.2078	27.3203
	272	25.0793	27.3203
	273	28.0697	27.3203
	274	24.0463	27.3203
	275	28.7022	27.3203
	276	27.6402	27.3203
	277	27.3157	27.3203
	278	26.1789	27.3203
	279	28.6096	27.3203
	280	27.7661	27.3203

## Sheet: IFN-lambda
	Bird #	Ct [GAPDH]	Mean Ct of control [GAPDH]	-∆∆	2-∆∆	Mean fold change in IFN-λ gene expression	2-∆∆/Mean fold change in IFN-λ gene expression	IFN-λ fold change over control (whole group)	Log2 IFN-λ fold change (Individual birds)
Control	201	14.0985	14.2737	-0.64235	1.56087	1.10982	1.40642	1	0.49203
	202	13.9617	14.2737	-0.83305	1.78145		1.60517	0.415627	0.68273
	203	14.5807	14.2737	0.76565	0.588188		0.529988		-0.91597
	204	14.1346	14.2737	-0.67275	1.59411		1.43637		0.52243
	205	14.0999	14.2737	-0.15145	1.11069		1.00078		0.00113031
	206	14.056	14.2737	-0.63265	1.55041		1.397		0.48233
	207	14.9027	14.2737	0.13375	0.911459		0.821271		-0.28407
	208	14.0637	14.2737	-0.73405	1.6633		1.49872		0.58373
	209	14.3808	14.2737	1.05185	0.482349		0.434621		-1.20217
	210	14.3685	14.2737	-0.12335	1.08926		0.98148		-0.0269697
	211	14.2138	14.2737	0.22755	0.854084		0.769573		-0.37787
	213	14.1023	14.2737	0.06885	0.953398		0.85906		-0.21917
	215	14.6434	14.2737	1.70345	0.307051		0.276669		-1.85377
	216	14.4337	14.2737	-0.34485	1.27002		1.14435		0.19453
	297	14.2153	14.2737	-0.50635	1.42045		1.2799		0.35603
	298	14.1241	14.2737	0.68975	0.619961		0.558617		-0.84007
CKPA	233	14.3099	14.2737	-5.29095	39.1503	93.9704	35.2764	84.6721	5.14063
	234	14.4071	14.2737	-2.25115	4.76062		4.28956	95.6263	2.10083
	235	14.4274	14.2737	-7.56595	189.486		170.737		7.41563
	236	14.3143	14.2737	-3.61165	12.224		11.0145		3.46133
	250	14.3597	14.2737	-6.19955	73.4938		66.2216		6.04923
	252	14.4271	14.2737	-8.29725	314.573		283.446		8.14693
	301	14.3662	14.2737	-5.53345	46.3164		41.7334		5.38313
	302	14.3668	14.2737	-6.14305	70.6712		63.6783		5.99273
	241	14.2713	14.2737	-8.54315	373.031		336.119		8.39283
	242	13.9778	14.2737	-6.21895	74.4887		67.1181		6.06863
	243	14.1995	14.2737	-6.06735	67.0586		60.4232		5.91703
	244	14.0022	14.2737	-4.90635	29.9888		27.0214		4.75603
	245	13.9913	14.2737	-5.60855	48.7912		43.9634		5.45823
	247	14.0699	14.2737	-5.43515	43.2656		38.9845		5.28483
	248	13.9732	14.2737	-5.77505	54.76		49.3415		5.62473
	259	14.2081	14.2737	-5.94175	61.4674		55.3853		5.79143
TKMN	265	14.1063	14.2737	-0.65215	1.57151	27.5213	1.41601	2.50197	0.50183
	266	14.2483	14.2737	1.23015	0.426273		0.384094	1.13124	-1.38047
	267	16.5487	14.2737	-1.52555	2.87896		2.59409		1.37523
	268	14.1832	14.2737	-1.94125	3.84038		3.46038		1.79093
	269	14.2398	14.2737	-8.46995	354.576		319.491		8.31963
	270	14.5942	14.2737	-2.38045	5.20699		4.69176		2.23013
	271	14.2195	14.2737	-1.86825	3.65089		3.28964		1.71793
	272	14.1082	14.2737	-1.58695	3.00414		2.70688		1.43663
	273	14.0709	14.2737	-0.54495	1.45897		1.31461		0.39463
	274	14.5007	14.2737	-5.55125	46.8914		42.2515		5.40093
	275	14.2786	14.2737	-1.01955	2.02729		1.82669		0.86923
	276	14.5351	14.2737	-1.63945	3.11547		2.8072		1.48913
	277	14.2488	14.2737	-1.28015	2.42864		2.18833		1.12983
	278	14.2192	14.2737	-1.19665	2.29207		2.06527		1.04633
	279	14.3625	14.2737	-1.33255	2.51847		2.26927		1.18223
	280	14.1234	14.2737	-2.15515	4.45415		4.01341		2.00483
	Bird #	Ct [IFN-λ]	Mean Ct of control [IFN-λ]
Control	201	27.6347	28.4523
	202	27.3072	28.4523
	203	29.5249	28.4523
	204	27.6404	28.4523
	205	28.127	28.4523
	206	27.6019	28.4523
	207	29.215	28.4523
	208	27.5082	28.4523
	209	29.6112	28.4523
	210	28.4237	28.4523
	211	28.6199	28.4523
	213	28.3497	28.4523
	215	30.5254	28.4523
	216	28.2674	28.4523
	297	27.8875	28.4523
	298	28.9924	28.4523
CKPA	233	23.1975	28.4523
	234	26.3345	28.4523
	235	21.04	28.4523
	236	24.8812	28.4523
	250	22.3387	28.4523
	252	20.3084	28.4523
	301	23.0113	28.4523
	302	22.4023	28.4523
	241	19.9067	28.4523
	242	21.9374	28.4523
	243	22.3107	28.4523
	244	23.2744	28.4523
	245	22.5613	28.4523
	247	22.8133	28.4523
	248	22.3767	28.4523
	259	22.4449	28.4523
TKMN	265	27.6327	28.4523
	266	29.657	28.4523
	267	29.2017	28.4523
	268	26.4205	28.4523
	269	19.9484	28.4523
	270	26.3923	28.4523
	271	26.5298	28.4523
	272	26.6998	28.4523
	273	27.7045	28.4523
	274	23.128	28.4523
	275	27.4376	28.4523
	276	27.0742	28.4523
	277	27.1472	28.4523
	278	27.2011	28.4523
	279	27.2085	28.4523
	280	26.1468	28.4523

## Sheet: OAS
	Bird #	Ct [GAPDH]	Mean Ct of control [GAPDH]	-∆∆	2-∆∆	Mean fold change in OAS gene expression	2-∆∆/Mean fold change in OAS gene expression	OAS fold change over control (whole group)	Log2 OAS fold change (Individual birds)
Control	201	14.0985	14.2737	-0.371456	1.29366	1.23079	1.05108	1	0.0718701
	202	13.9617	14.2737	-1.42726	2.68935		2.18506		1.12767
	203	14.5807	14.2737	-1.85386	3.61465		2.93685		1.55427
	204	14.1346	14.2737	-1.29566	2.45489		1.99456		0.99607
	205	14.0999	14.2737	-0.401456	1.32084		1.07316		0.10187
	206	14.056	14.2737	0.421444	0.746677		0.606664		-0.72103
	207	14.9027	14.2737	1.31954	0.400662		0.325532		-1.61913
	208	14.0637	14.2737	0.0720438	0.951289		0.772909		-0.37163
	209	14.3808	14.2737	-0.224156	1.16809		0.949059		-0.0754299
	210	14.3685	14.2737	0.522844	0.695999		0.565489		-0.82243
	211	14.2138	14.2737	0.882844	0.542297		0.440609		-1.18243
	213	14.1023	14.2737	0.0219438	0.984905		0.800221		-0.32153
	215	14.6434	14.2737	0.362544	0.777792		0.631945		-0.66213
	216	14.4337	14.2737	0.938644	0.521723		0.423892		-1.23823
	297	14.2153	14.2737	1.13614	0.454974		0.36966		-1.43573
	298	14.1241	14.2737	-0.104156	1.07487		0.873313		-0.19543
CKPA	233	14.3099	14.2737	-7.39796	168.658	143.807	137.032	116.841	7.09837
	234	14.4071	14.2737	-5.81366	56.2451		45.6983		5.51407
	235	14.4274	14.2737	-7.18256	145.266		118.027		6.88297
	236	14.3143	14.2737	-6.60706	97.4815		79.2023		6.30747
	250	14.3597	14.2737	-8.08876	272.244		221.194		7.78917
	252	14.4271	14.2737	-7.76436	217.422		176.652		7.46477
	301	14.3662	14.2737	-7.31906	159.682		129.739		7.01947
	302	14.3668	14.2737	-7.10496	137.659		111.846		6.80537
	241	14.2713	14.2737	-7.42156	171.44		139.292		7.12197
	242	13.9778	14.2737	-5.29126	39.1586		31.8158		4.99167
	243	14.1995	14.2737	-7.34806	162.924		132.373		7.04847
	244	14.0022	14.2737	-6.76616	108.847		88.4365		6.46657
	245	13.9913	14.2737	-7.68076	205.181		166.707		7.38117
	247	14.0699	14.2737	-6.58336	95.8932		77.9118		6.28377
	248	13.9732	14.2737	-6.95496	124.065		100.801		6.65537
	259	14.2081	14.2737	-7.11636	138.751		112.733		6.81677
TKMN	265	14.1063	14.2737	-5.84116	57.3275	67.9114	46.5778	55.177	5.54157
	266	14.2483	14.2737	-5.44166	43.4612		35.3116		5.14207
	267	16.5487	14.2737	-7.06306	133.719		108.644		6.76347
	268	14.1832	14.2737	-6.28156	77.7923		63.2051		5.98197
	269	14.2398	14.2737	-7.44476	174.219		141.55		7.14517
	270	14.5942	14.2737	-7.13996	141.04		114.593		6.84037
	271	14.2195	14.2737	-6.13036	70.0521		56.9163		5.83077
	272	14.1082	14.2737	-5.80336	55.845		45.3733		5.50377
	273	14.0709	14.2737	-4.52476	23.019		18.7026		4.22517
	274	14.5007	14.2737	-6.83316	114.021		92.6404		6.53357
	275	14.2786	14.2737	-4.92786	30.4392		24.7314		4.62827
	276	14.5351	14.2737	-4.54976	23.4214		19.0296		4.25017
	277	14.2488	14.2737	-5.74656	53.6891		43.6216		5.44697
	278	14.2192	14.2737	-4.47886	22.2982		18.117		4.17927
	279	14.3625	14.2737	-5.02726	32.6103		26.4954		4.72767
	280	14.1234	14.2737	-5.07166	33.6295		27.3235		4.77207
	Bird #	Ct [OAS]	Mean Ct of control [OAS]
Control	201	21.586	22.1327
	202	20.3934	22.1327
	203	20.5858	22.1327
	204	20.6979	22.1327
	205	21.5574	22.1327
	206	22.3364	22.1327
	207	24.0812	22.1327
	208	21.9947	22.1327
	209	22.0156	22.1327
	210	22.7503	22.1327
	211	22.9556	22.1327
	213	21.9832	22.1327
	215	22.8649	22.1327
	216	23.2313	22.1327
	297	23.2104	22.1327
	298	21.8789	22.1327
CKPA	233	14.7709	22.1327
	234	16.4524	22.1327
	235	15.1038	22.1327
	236	15.5662	22.1327
	250	14.1299	22.1327
	252	14.5217	22.1327
	301	14.9061	22.1327
	302	15.1208	22.1327
	241	14.7087	22.1327
	242	16.5455	22.1327
	243	14.7104	22.1327
	244	15.095	22.1327
	245	14.1695	22.1327
	247	15.3455	22.1327
	248	14.8772	22.1327
	259	14.9507	22.1327
TKMN	265	16.1241	22.1327
	266	16.6656	22.1327
	267	17.3446	22.1327
	268	15.7606	22.1327
	269	14.654	22.1327
	270	15.3132	22.1327
	271	15.9481	22.1327
	272	16.1638	22.1327
	273	17.4051	22.1327
	274	15.5265	22.1327
	275	17.2097	22.1327
	276	17.8443	22.1327
	277	16.3612	22.1327
	278	17.5993	22.1327
	279	17.1942	22.1327
	280	16.9107	22.1327

## Sheet: Mx
	Bird #	Ct [GAPDH]	Mean Ct of control [GAPDH]	-∆∆	2-∆∆	Mean fold change in Mx gene expression	2-∆∆/Mean fold change in Mx gene expression	Mx fold change over control (whole group)	Log2 Mx fold change (Individual birds)
Control	201	14.0985	14.2737	1.25335	0.419473	1.43207	0.292913	1	-1.77146
	202	13.9617	14.2737	-1.13725	2.19961		1.53596		0.619143
	203	14.5807	14.2737	-0.22435	1.16825		0.815775		-0.293757
	204	14.1346	14.2737	0.10825	0.927713		0.64781		-0.626357
	205	14.0999	14.2737	-1.76125	3.38992		2.36714		1.24314
	206	14.056	14.2737	1.09245	0.468964		0.327472		-1.61056
	207	14.9027	14.2737	2.57925	0.167328		0.116843		-3.09736
	208	14.0637	14.2737	1.84785	0.277806		0.193989		-2.36596
	209	14.3808	14.2737	-1.16625	2.24428		1.56715		0.648143
	210	14.3685	14.2737	-0.85605	1.81008		1.26395		0.337943
	211	14.2138	14.2737	-0.55845	1.47269		1.02836		0.0403432
	213	14.1023	14.2737	-0.74355	1.67429		1.16914		0.225443
	215	14.6434	14.2737	0.09215	0.938124		0.65508		-0.610257
	216	14.4337	14.2737	-0.68475	1.60742		1.12244		0.166643
	297	14.2153	14.2737	-1.97035	3.91863		2.73633		1.45224
	298	14.1241	14.2737	2.12895	0.228624		0.159645		-2.64706
CKPA	233	14.3099	14.2737	-1.24655	2.37273	2.94454	1.65685	2.05613	0.728443
	234	14.4071	14.2737	-1.69835	3.2453		2.26615		1.18024
	235	14.4274	14.2737	-1.93525	3.82444		2.67056		1.41714
	236	14.3143	14.2737	-2.56675	5.92473		4.13717		2.04864
	250	14.3597	14.2737	-1.79815	3.47774		2.42846		1.28004
	252	14.4271	14.2737	-2.14535	4.424		3.08922		1.62724
	301	14.3662	14.2737	-1.32735	2.50941		1.75229		0.809243
	302	14.3668	14.2737	0.60445	0.657722		0.459279		-1.12256
	241	14.2713	14.2737	-0.79245	1.73201		1.20944		0.274343
	242	13.9778	14.2737	-1.63155	3.09846		2.16361		1.11344
	243	14.1995	14.2737	-2.39485	5.25922		3.67245		1.87674
	244	14.0022	14.2737	-2.25645	4.77814		3.33652		1.73834
	245	13.9913	14.2737	-0.42305	1.34076		0.936235		-0.0950568
	247	14.0699	14.2737	-0.78455	1.72255		1.20284		0.266443
	248	13.9732	14.2737	-0.72735	1.6556		1.15608		0.209243
	259	14.2081	14.2737	-0.12405	1.08979		0.760987		-0.394057
TKMN	265	14.1063	14.2737	-2.19355	4.5743	2.93082	3.19417	2.04656	1.67544
	266	14.2483	14.2737	-1.93475	3.82312		2.66964		1.41664
	267	16.5487	14.2737	-2.16825	4.49478		3.13865		1.65014
	268	14.1832	14.2737	-1.67355	3.18999		2.22753		1.15544
	269	14.2398	14.2737	-1.64855	3.13518		2.18926		1.13044
	270	14.5942	14.2737	-2.29625	4.91179		3.42984		1.77814
	271	14.2195	14.2737	-2.31715	4.98347		3.47989		1.79904
	272	14.1082	14.2737	-0.80075	1.74201		1.21642		0.282643
	273	14.0709	14.2737	-0.64895	1.56803		1.09493		0.130843
	274	14.5007	14.2737	-2.14495	4.42277		3.08836		1.62684
	275	14.2786	14.2737	-0.90125	1.86768		1.30418		0.383143
	276	14.5351	14.2737	-1.08225	2.11734		1.47851		0.564143
	277	14.2488	14.2737	-0.70755	1.63303		1.14032		0.189443
	278	14.2192	14.2737	-1.25265	2.38279		1.66387		0.734543
	279	14.3625	14.2737	-0.18745	1.13875		0.795174		-0.330657
	280	14.1234	14.2737	0.13905	0.908117		0.634127		-0.657157
	Bird #	Ct [Mx]	Mean Ct of control [Mx]
Control	201	34.1632	33.0851
	202	31.6358	33.0851
	203	33.1677	33.0851
	204	33.0542	33.0851
	205	31.15	33.0851
	206	33.9598	33.0851
	207	36.2933	33.0851
	208	34.7229	33.0851
	209	32.0259	33.0851
	210	32.3238	33.0851
	211	32.4667	33.0851
	213	32.1701	33.0851
	215	33.5469	33.0851
	216	32.5603	33.0851
	297	31.0563	33.0851
	298	35.0644	33.0851
CKPA	233	31.8747	33.0851
	234	31.5201	33.0851
	235	31.3035	33.0851
	236	30.5589	33.0851
	250	31.3729	33.0851
	252	31.0931	33.0851
	301	31.8502	33.0851
	302	33.7826	33.0851
	241	32.2902	33.0851
	242	31.1576	33.0851
	243	30.616	33.0851
	244	30.5571	33.0851
	245	32.3796	33.0851
	247	32.0967	33.0851
	248	32.0572	33.0851
	259	32.8954	33.0851
TKMN	265	30.7241	33.0851
	266	31.1249	33.0851
	267	33.1918	33.0851
	268	31.321	33.0851
	269	31.4026	33.0851
	270	31.1093	33.0851
	271	30.7137	33.0851
	272	32.1188	33.0851
	273	32.2333	33.0851
	274	31.1671	33.0851
	275	32.1887	33.0851
	276	32.2642	33.0851
	277	32.3526	33.0851
	278	31.7779	33.0851
	279	32.9864	33.0851
	280	33.0738	33.0851

## Sheet: IL-6
	Bird #	Ct [GAPDH]	Mean Ct of control [GAPDH]	-∆∆	2-∆∆	Mean fold change in IL-6 gene expression	2-∆∆/Mean fold change in IL-6 gene expression	IL-6 fold change over control (whole group)	Log2 IL-6 fold change (Individual birds)
Control	201	14.0985	14.2737	-0.969138	1.95767	1.15163	1.69991	1	0.765462
	202	13.9617	14.2737	2.21736	0.215034		0.186722		-2.42104
	203	14.5807	14.2737	-0.599438	1.51513		1.31564		0.395762
	204	14.1346	14.2737	-0.557838	1.47206		1.27824		0.354162
	205	14.0999	14.2737	-0.482538	1.3972		1.21324		0.278862
	206	14.056	14.2737	-0.597938	1.51355		1.31427		0.394262
	207	14.9027	14.2737	-0.808238	1.75107		1.52052		0.604562
	208	14.0637	14.2737	-0.481738	1.39642		1.21256		0.278062
	209	14.3808	14.2737	0.741862	0.597967		0.519236		-0.945538
	210	14.3685	14.2737	-0.386738	1.30743		1.13529		0.183062
	211	14.2138	14.2737	0.703062	0.614267		0.53339		-0.906738
	213	14.1023	14.2737	-0.0433375	1.03049		0.894815		-0.160338
	215	14.6434	14.2737	1.67266	0.313674		0.272374		-1.87634
	216	14.4337	14.2737	-0.226138	1.1697		1.01569		0.0224619
	297	14.2153	14.2737	-0.384538	1.30544		1.13356		0.180862
	298	14.1241	14.2737	0.202662	0.868945		0.754536		-0.406338
CKPA	233	14.3099	14.2737	-0.531038	1.44497	6.02144	1.25472	5.22863	0.327362
	234	14.4071	14.2737	-1.12164	2.17594		1.88944		0.917962
	235	14.4274	14.2737	-3.84574	14.3775		12.4845		3.64206
	236	14.3143	14.2737	-1.69204	3.23113		2.8057		1.48836
	250	14.3597	14.2737	-4.09654	17.1073		14.8548		3.89286
	252	14.4271	14.2737	-4.24684	18.9857		16.4859		4.04316
	301	14.3662	14.2737	-2.10754	4.30955		3.74214		1.90386
	302	14.3668	14.2737	-1.77804	3.42959		2.97804		1.57436
	241	14.2713	14.2737	-2.83684	7.14452		6.20384		2.63316
	242	13.9778	14.2737	-1.23824	2.3591		2.04849		1.03456
	243	14.1995	14.2737	-0.994038	1.99175		1.72951		0.790362
	244	14.0022	14.2737	-2.37964	5.20406		4.51887		2.17596
	245	13.9913	14.2737	-2.51094	5.6999		4.94943		2.30726
	247	14.0699	14.2737	-0.593638	1.50905		1.31036		0.389962
	248	13.9732	14.2737	-1.91224	3.76392		3.26835		1.70856
	259	14.2081	14.2737	-1.85164	3.6091		3.13391		1.64796
TKMN	265	14.1063	14.2737	-0.628338	1.54578	3.54098	1.34226	3.07476	0.424662
	266	14.2483	14.2737	-0.802738	1.74441		1.51473		0.599062
	267	16.5487	14.2737	-1.39684	2.63324		2.28653		1.19316
	268	14.1832	14.2737	-0.716838	1.64358		1.42717		0.513162
	269	14.2398	14.2737	-4.32794	20.0835		17.4392		4.12426
	270	14.5942	14.2737	-1.29074	2.44653		2.12441		1.08706
	271	14.2195	14.2737	-0.864138	1.82025		1.58059		0.660462
	272	14.1082	14.2737	-0.573338	1.48796		1.29205		0.369662
	273	14.0709	14.2737	-0.641438	1.55988		1.3545		0.437762
	274	14.5007	14.2737	-2.51904	5.732		4.9773		2.31536
	275	14.2786	14.2737	-0.696538	1.62061		1.40723		0.492862
	276	14.5351	14.2737	-1.39514	2.63014		2.28384		1.19146
	277	14.2488	14.2737	-1.79354	3.46664		3.01021		1.58986
	278	14.2192	14.2737	-0.229138	1.17213		1.01781		0.0254619
	279	14.3625	14.2737	-2.45744	5.4924		4.76925		2.25376
	280	14.1234	14.2737	-0.656838	1.57662		1.36904		0.453162
	Bird #	Ct [IL-6]	Mean Ct of control [IL-6]
Control	201	22.0941	23.2385
	202	25.1438	23.2385
	203	22.946	23.2385
	204	22.5415	23.2385
	205	22.5821	23.2385
	206	22.4228	23.2385
	207	23.0592	23.2385
	208	22.5467	23.2385
	209	24.0874	23.2385
	210	22.9465	23.2385
	211	23.8816	23.2385
	213	23.0237	23.2385
	215	25.2808	23.2385
	216	23.1723	23.2385
	297	22.7955	23.2385
	298	23.2915	23.2385
CKPA	233	22.7436	23.2385
	234	22.2502	23.2385
	235	19.5464	23.2385
	236	21.587	23.2385
	250	19.2279	23.2385
	252	19.145	23.2385
	301	21.2234	23.2385
	302	21.5535	23.2385
	241	20.3992	23.2385
	242	21.7043	23.2385
	243	22.1702	23.2385
	244	20.5873	23.2385
	245	20.4451	23.2385
	247	22.441	23.2385
	248	21.0257	23.2385
	259	21.3212	23.2385
TKMN	265	22.4427	23.2385
	266	22.4103	23.2385
	267	24.1166	23.2385
	268	22.4311	23.2385
	269	18.8766	23.2385
	270	22.2682	23.2385
	271	22.3201	23.2385
	272	22.4996	23.2385
	273	22.3942	23.2385
	274	20.9464	23.2385
	275	22.5468	23.2385
	276	22.1047	23.2385
	277	21.42	23.2385
	278	22.9548	23.2385
	279	20.8698	23.2385
	280	22.4313	23.2385

## Sheet: LITAF
	Bird #	Ct [GAPDH]	Mean Ct of control [GAPDH]	-∆∆	2-∆∆	Mean fold change in LITAF gene expression	2-∆∆/Mean fold change in LITAF gene expression	LITAF fold change over control (whole group)	Log2 LITAF fold change (Individual birds)
Control	201	14.0985	14.2737	-0.539394	1.45336	1.17733	1.23446	1	0.30388
	202	13.9617	14.2737	-0.430694	1.34788		1.14487	0.48113	0.19518
	203	14.5807	14.2737	-1.20979	2.31305		1.96466		0.97428
	204	14.1346	14.2737	-0.372194	1.29432		1.09937		0.13668
	205	14.0999	14.2737	-0.248994	1.18838		1.00939		0.0134801
	206	14.056	14.2737	-0.171194	1.12599		0.956396		-0.0643199
	207	14.9027	14.2737	0.111206	0.925814		0.78637		-0.34672
	208	14.0637	14.2737	-0.465794	1.38108		1.17306		0.23028
	209	14.3808	14.2737	0.771406	0.585846		0.497608		-1.00692
	210	14.3685	14.2737	2.56681	0.168777		0.143357		-2.80232
	211	14.2138	14.2737	-0.375494	1.29728		1.10189		0.13998
	213	14.1023	14.2737	-0.940994	1.91985		1.63069		0.70548
	215	14.6434	14.2737	1.62121	0.325064		0.276103		-1.85672
	216	14.4337	14.2737	-0.813594	1.75758		1.49286		0.57808
	297	14.2153	14.2737	0.662506	0.63178		0.536623		-0.89802
	298	14.1241	14.2737	-0.164994	1.12116		0.952295		-0.0705199
CKPA	233	14.3099	14.2737	-0.561394	1.47569	1.678	1.25343	1.42526	0.32588
	234	14.4071	14.2737	-0.222794	1.16699		0.991222	0.496853	-0.0127199
	235	14.4274	14.2737	-0.370494	1.2928		1.09808		0.13498
	236	14.3143	14.2737	-0.409594	1.32831		1.12824		0.17408
	250	14.3597	14.2737	-0.229194	1.17218		0.995629		-0.00631986
	252	14.4271	14.2737	-0.641094	1.55951		1.32462		0.40558
	301	14.3662	14.2737	-0.431294	1.34844		1.14534		0.19578
	302	14.3668	14.2737	0.649806	0.637366		0.541367		-0.88532
	241	14.2713	14.2737	-0.695694	1.61966		1.37571		0.46018
	242	13.9778	14.2737	-1.31679	2.49112		2.11591		1.08128
	243	14.1995	14.2737	-0.838994	1.7888		1.51938		0.60348
	244	14.0022	14.2737	-1.20769	2.30968		1.9618		0.97218
	245	13.9913	14.2737	-0.760294	1.69384		1.43871		0.52478
	247	14.0699	14.2737	-1.18559	2.27457		1.93198		0.95008
	248	13.9732	14.2737	-0.783094	1.72082		1.46163		0.54758
	259	14.2081	14.2737	-1.56959	2.96821		2.52115		1.33408
TKMN	265	14.1063	14.2737	-1.63079	3.09683	1.23073	2.6304	1.04536	1.39528
	266	14.2483	14.2737	0.776306	0.58386		0.49592	0.628243	-1.01182
	267	16.5487	14.2737	-0.0833938	1.05951		0.899927		-0.15212
	268	14.1832	14.2737	-0.436994	1.35378		1.14988		0.20148
	269	14.2398	14.2737	-1.33559	2.52379		2.14367		1.10008
	270	14.5942	14.2737	-0.464994	1.38031		1.17241		0.22948
	271	14.2195	14.2737	-0.175694	1.12951		0.959384		-0.0598199
	272	14.1082	14.2737	-0.637594	1.55573		1.32141		0.40208
	273	14.0709	14.2737	1.04231	0.485551		0.412418		-1.27782
	274	14.5007	14.2737	-0.597294	1.51288		1.28501		0.36178
	275	14.2786	14.2737	0.421306	0.746748		0.634275		-0.65682
	276	14.5351	14.2737	-0.626394	1.5437		1.31119		0.39088
	277	14.2488	14.2737	-0.122394	1.08854		0.924586		-0.11312
	278	14.2192	14.2737	0.501606	0.70632		0.599936		-0.73712
	279	14.3625	14.2737	0.935806	0.52275		0.444015		-1.17132
	280	14.1234	14.2737	1.31541	0.401812		0.341292		-1.55092
	Bird #	Ct [LITAF]	Mean Ct of control [LITAF]
Control	201	18.8136	19.5282
	202	18.7855	19.5282
	203	18.6254	19.5282
	204	19.0169	19.5282
	205	19.1054	19.5282
	206	19.1393	19.5282
	207	20.2684	19.5282
	208	18.8524	19.5282
	209	20.4067	19.5282
	210	22.1898	19.5282
	211	19.0928	19.5282
	213	18.4158	19.5282
	215	21.5191	19.5282
	216	18.8746	19.5282
	297	20.1323	19.5282
	298	19.2136	19.5282
CKPA	233	19.003	19.5282
	234	19.4388	19.5282
	235	19.3114	19.5282
	236	19.1592	19.5282
	250	19.385	19.5282
	252	19.0405	19.5282
	301	19.1894	19.5282
	302	20.2711	19.5282
	241	18.8301	19.5282
	242	17.9155	19.5282
	243	18.615	19.5282
	244	18.049	19.5282
	245	18.4855	19.5282
	247	18.1388	19.5282
	248	18.4446	19.5282
	259	17.893	19.5282
TKMN	265	17.73	19.5282
	266	20.2791	19.5282
	267	21.7198	19.5282
	268	19.0007	19.5282
	269	18.1587	19.5282
	270	19.3837	19.5282
	271	19.2983	19.5282
	272	18.7251	19.5282
	273	20.3677	19.5282
	274	19.1579	19.5282
	275	19.9544	19.5282
	276	19.1632	19.5282
	277	19.3809	19.5282
	278	19.9753	19.5282
	279	20.5528	19.5282
	280	20.6933	19.5282
